# Supplementary material for: Therapeutic Intervention for Various Hospital Setting Strains of Biofilm Forming Candida auris with Multiple Drug Resistance Mutations Using Nanomaterial Ag-Silicalite-1 Zeolite
Source: MDPI journal article supplement (doi:10.3390/pharmaceutics14102251), 2022-10-21
Supplement: s1 [file s1]

# Therapeutic intervention for various hospital setting strains of biofilm forming *Candida auris* with multiple drug resistance mutations using nanomaterial Ag-Silicalite-1 zeolite

Hanan A Aldossary <sup>1</sup>, Suriya Rehman <sup>2</sup>, B. Rabindran Jermy <sup>3</sup>, Reem AlJindan <sup>4</sup>, Afra Aldayel <sup>5</sup>, Sayed AbdulAzeez <sup>6</sup>, Sultan Akhtar <sup>7</sup>, Firdos Alam Khan <sup>8</sup>, J. Francis Borgio <sup>2,6,\*</sup> and Ebtesam Abdullah Al-Suhaimi <sup>9,\*</sup>

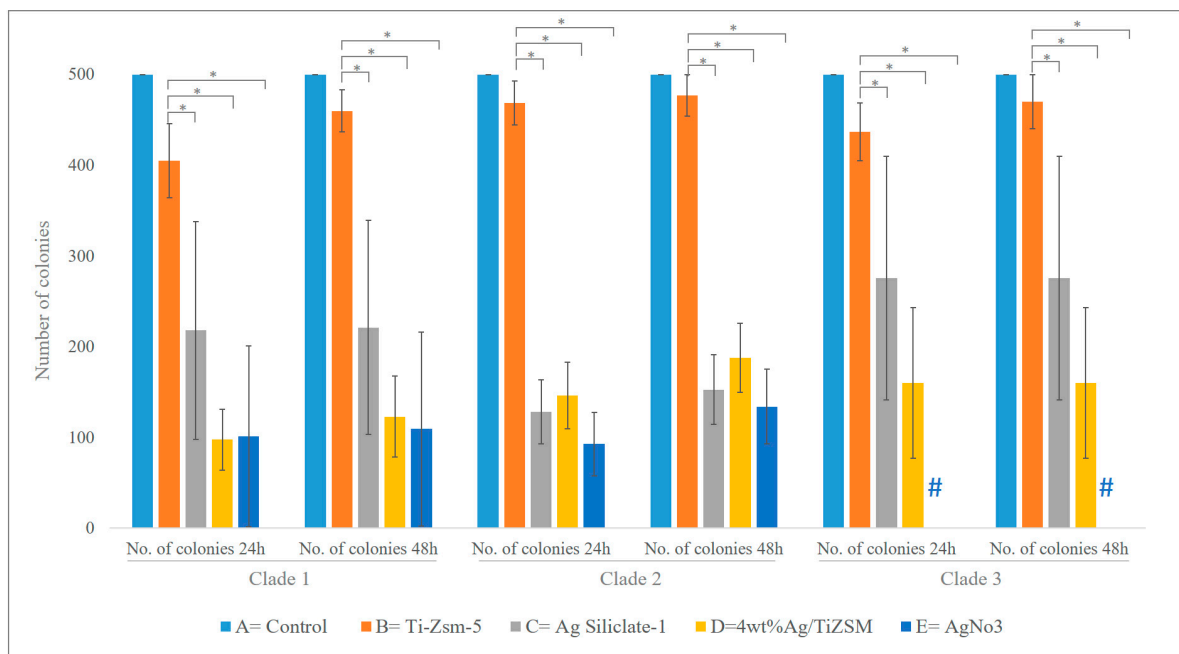

**Supplementary Figure S1.** Graph showing the effect of synthesized nanomaterial on planktonic cells of 3 different clades *C. auris* strains after 48 hours of incubation period. # Complete absence of growth. \*  $p < 0.01$ .
